# Supplementary material for: The Genus Capsicum: A Review of Bioactive Properties of Its Polyphenolic and Capsaicinoid Composition
Source: MDPI journal article supplement (doi:10.3390/molecules28104239), 2023-05-22
Supplement: s1 [file s1]

Figure S1

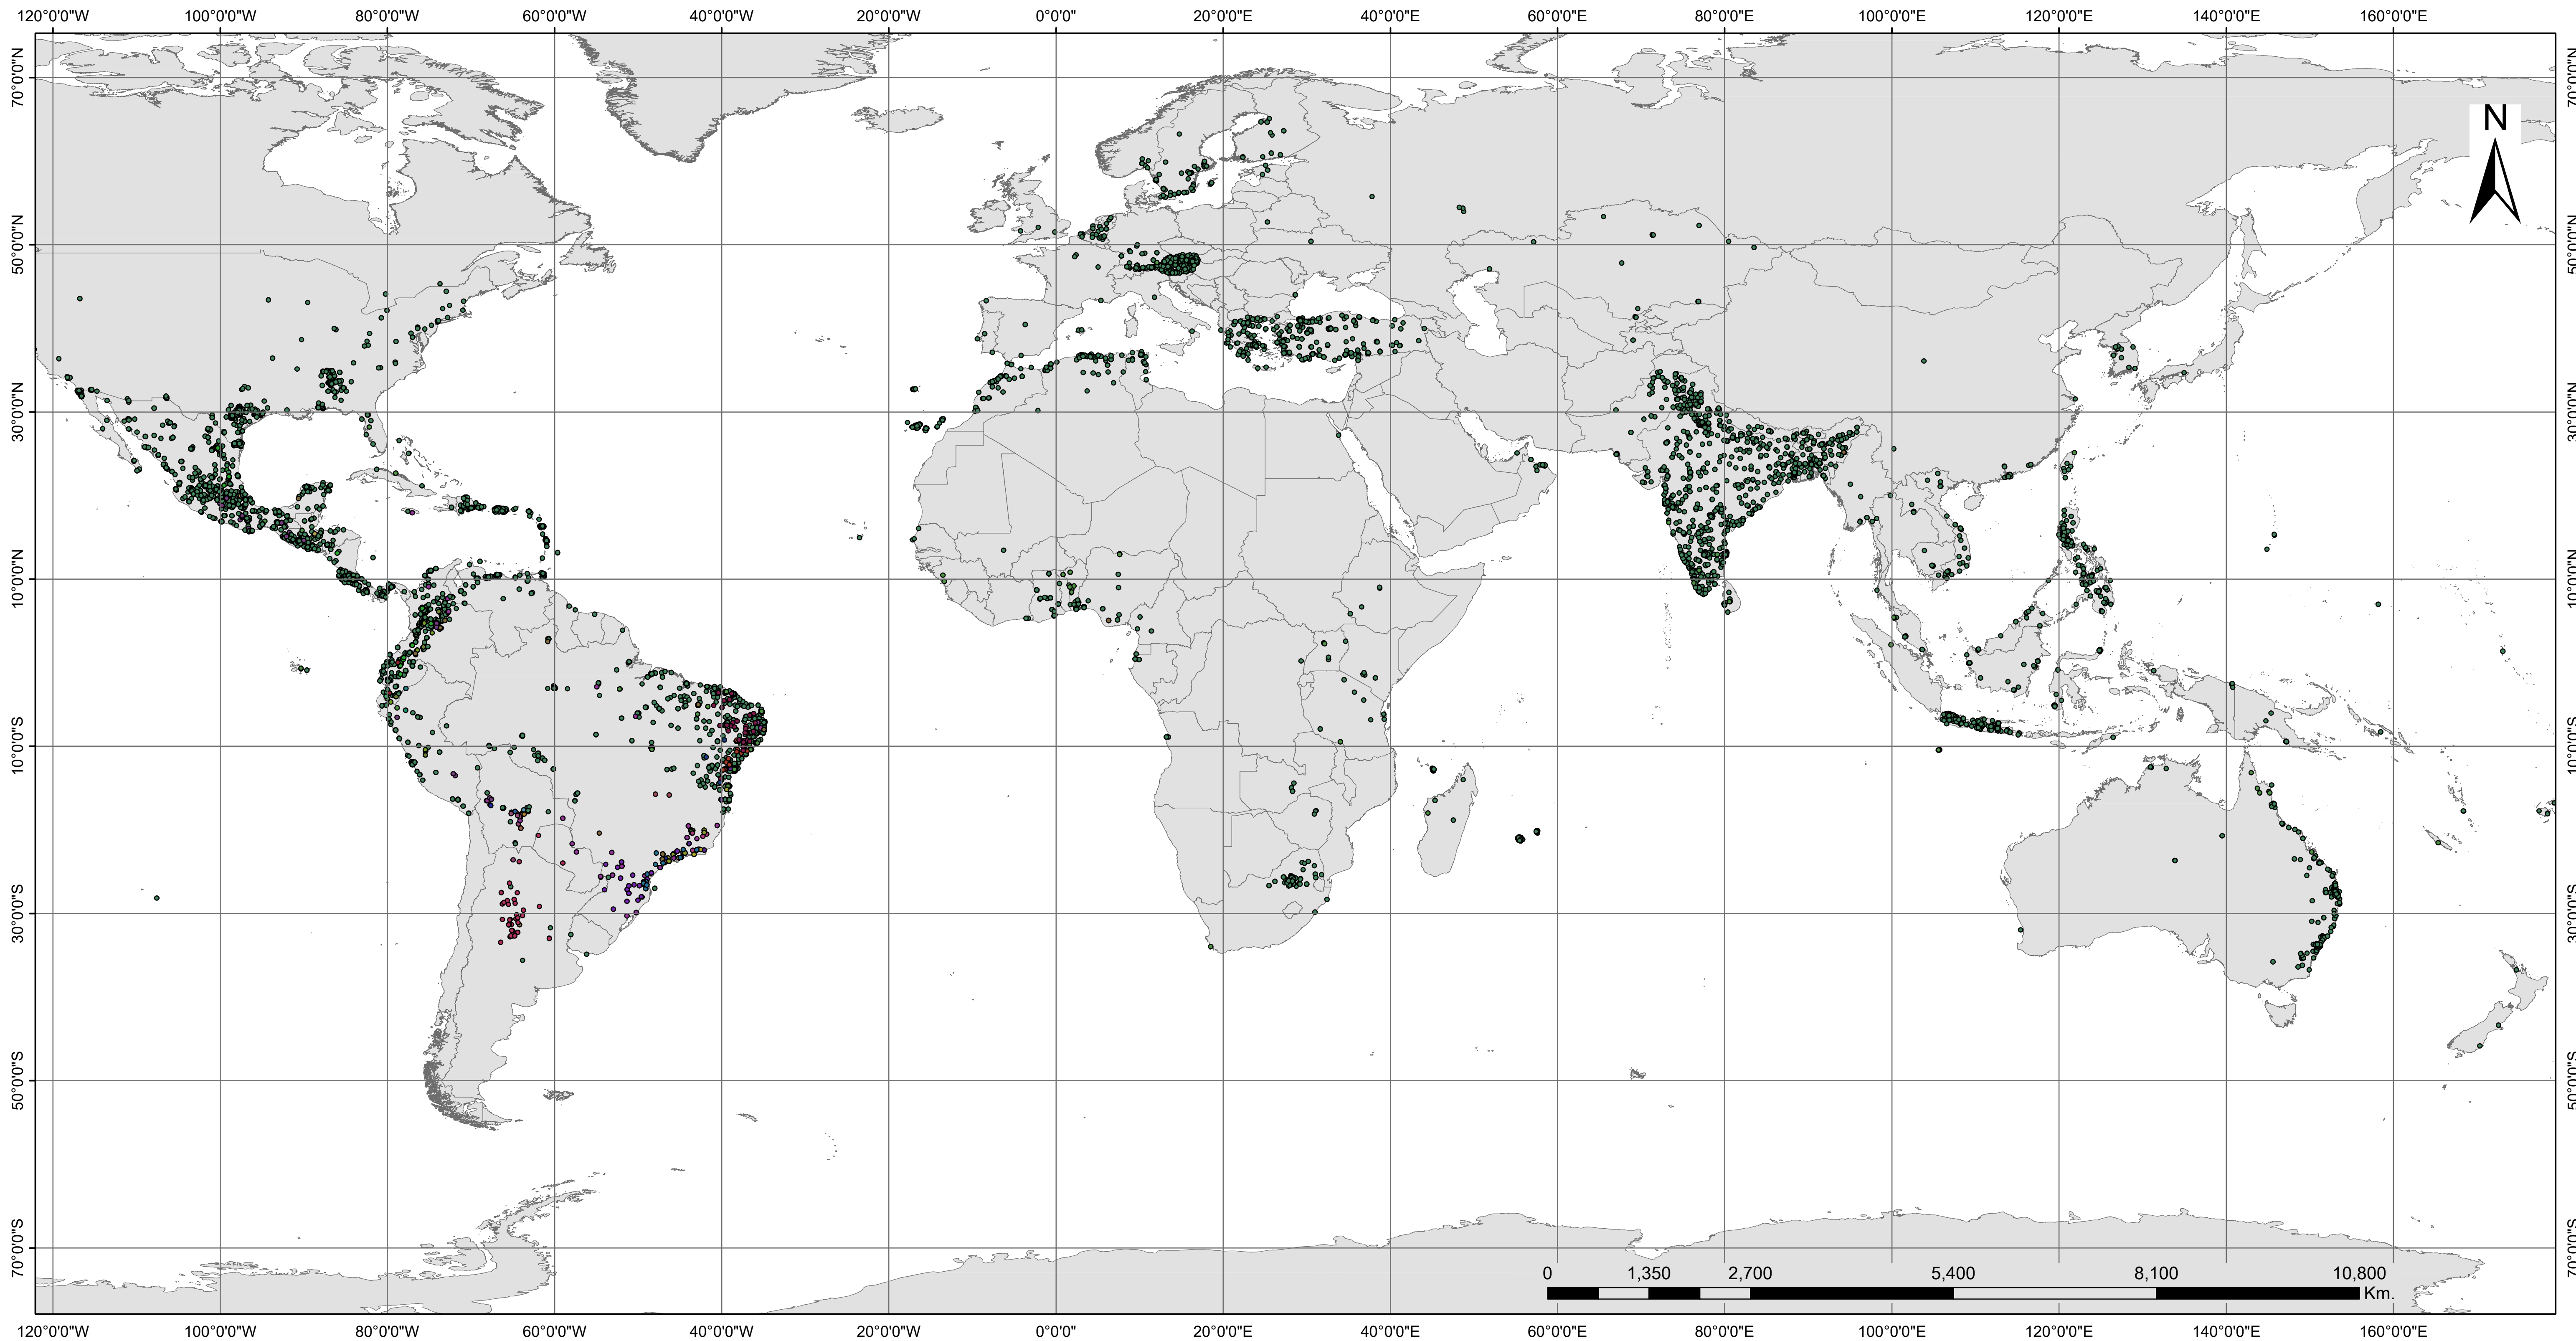

- |                                          |                                           |                                                                |                                            |                                        |
|------------------------------------------|-------------------------------------------|----------------------------------------------------------------|--------------------------------------------|----------------------------------------|
| ● <i>C. annuum</i> L.                    | ● <i>C. chinense</i> Jacq.                | ● <i>C. frutescens</i> L.                                      | ● <i>C. minutiflorum</i> (Rusby) Hunz.     | ● <i>C. recurvatum</i> Witasek         |
| ● <i>C. baccatum</i> L.                  | ● <i>C. coccineum</i> (Rusby) Hunz.       | ● <i>C. geminifolium</i> (Dammer) Hunz.                        | ● <i>C. mirabile</i> Mart.                 | ● <i>C. regale</i> Barboza & Bohs      |
| ● <i>C. caatingae</i> Barboza & Agra     | ● <i>C. comutum</i> (Hiern) Hunz.         | ● <i>C. hookerianum</i> (Miers) Kuntze                         | ● <i>C. neei</i> Barboza & X.Reyes         | ● <i>C. rhomboideum</i> (Dunal) Kuntze |
| ● <i>C. caballeroi</i> M.Nee             | ● <i>C. dimorphum</i> (Miers) Kuntze      | ● <i>C. hunzikerianum</i> Barboza & Bianch.                    | ● <i>C. parvifolium</i> Sendtn.            | ● <i>C. schottianum</i> Sendtn.        |
| ● <i>C. campylopodium</i> Sendtn.        | ● <i>C. eshbaughii</i> Barboza            | ● <i>C. lanceolatum</i> (Greenm. ex Donn.Sm.) Morton & Standl. | ● <i>C. pereirae</i> Barboza & Bianch.     | ● <i>C. scolnikianum</i> Hunz.         |
| ● <i>C. carassense</i> Barboza & Bianch. | ● <i>C. eximium</i> Hunz.                 | ● <i>C. longidentatum</i> Agra & Barboza                       | ● <i>C. praetermissum</i> Heiser & P.G.Sm. | ● <i>C. sinense</i> Jacq.              |
| ● <i>C. cardenasii</i> Heiser & P.G.Sm.  | ● <i>C. flexuosum</i> Sendtn.             | ● <i>C. lycianthoides</i> Bitter                               | ● <i>C. pubescens</i> Ruiz & Pav.          | ● <i>C. villosum</i> Sendtn.           |
| ● <i>C. chacoense</i> Hunz.              | ● <i>C. friburgense</i> Bianch. & Barboza |                                                                |                                            |                                        |
